# Supplementary material for: SARS-CoV-2 Altered Hemorheological and Hematological Parameters during One-Month Observation Period in Critically Ill COVID-19 Patients
Source: MDPI journal article supplement (doi:10.3390/ijms232315332), 2022-12-05
Supplement: s1 [file s1]

## Supplemental S1: Detailed descriptive statistics + statistical data for all determined variables

Table S1

Descriptive Statistics and statistical results of hematological variables

|                                                        | CON   |       | aCOV T0 |         | aCOV T2 |        | aCOV T5 |        | aCOV T10 |         | aCOV T30 |         |
|--------------------------------------------------------|-------|-------|---------|---------|---------|--------|---------|--------|----------|---------|----------|---------|
|                                                        | M     | SD    | M       | SD      | M       | SD     | M       | SD     | M        | SD      | M        | SD      |
| <b>Neutrophil Granulocytes</b><br>[10 <sup>9</sup> /L] | 57.02 | 14.86 | 74.91   | 12.18   | 78.28   | 8.05   | 73.97   | 10.69  | 78.06    | 9.50    | 58.76    | 16.00   |
| <b>Ferritin</b><br>[µg/L]                              | -     | -     | 1555.36 | 3159.39 | 1139.44 | 948.76 | 966.72  | 852.90 | 1132.22  | 1425.73 | 1789.17  | 2062.31 |
| <b>D-Dimers</b><br>[mg/IU]                             | 1.03  | 3.54  | 2.33    | 4.95    | 3.46    | 6.36   | 5.83    | 7.81   | 4.03     | 5.50    | 1.89     | 2.51    |
| <b>Erythrocytes</b><br>[10 <sup>12</sup> /L]           | 4.49  | 0.63  | 4.06    | 0.72    | 3.77    | 0.69   | 4.10    | 0.74   | 3.81     | 0.67    | 3.90     | 0.80    |
| <b>Leukocytes</b><br>[10 <sup>9</sup> /L]              | 6.21  | 2.72  | 7.88    | 9.75    | 6.94    | 3.12   | 8.36    | 3.04   | 10.50    | 3.90    | 10.92    | 14.71   |
| <b>MCV</b><br>[fl]                                     | 90.22 | 5.76  | 90.18   | 6.76    | 90.36   | 7.96   | 88.25   | 6.83   | 90.75    | 4.97    | 93.55    | 6.54    |
| <b>MCHC</b><br>[g/dL]                                  | 34.39 | 1.25  | 34.07   | 0.93    | 33.60   | 1.17   | 33.96   | 0.97   | 33.67    | 0.56    | 33.30    | 0.99    |
| <b>Hematocrit</b><br>[%]                               | 40.00 | 5.00  | 36.00   | 6.00    | 34.00   | 6.00   | 36.00   | 6.00   | 35.00    | 7.00    | 36.00    | 7.00    |
| <b>Hemoglobin</b><br>[g/dL]                            | 13.89 | 1.75  | 12.39   | 2.00    | 11.38   | 1.95   | 12.25   | 2.24   | 11.70    | 2.45    | 12.08    | 2.28    |

|                                            |        |       |        |       |        |       |        |        |        |       |        |       |
|--------------------------------------------|--------|-------|--------|-------|--------|-------|--------|--------|--------|-------|--------|-------|
| <b>MCH<br/>[pg]</b>                        | 31.05  | 2.62  | 30.73  | 2.45  | 30.33  | 2.65  | 29.96  | 2.33   | 30.57  | 1.86  | 31.15  | 2.41  |
| <b>Thrombocytes<br/>[10<sup>9</sup>/L]</b> | 236.36 | 63.16 | 192.17 | 76.93 | 221.56 | 75.78 | 283.97 | 123.16 | 207.45 | 93.58 | 235.19 | 75.26 |
| <b>Relative<br/>Eosinophils<br/>[%]</b>    | 2.08   | 1.78  | 0.30   | 0.68  | 0.75   | 1.24  | 1.09   | 1.23   | 0.70   | 0.72  | 2.89   | 2.08  |
| <b>CRP<br/>[mg/L]</b>                      | -      | -     | 95.52  | 71.70 | 70.04  | 64.25 | 19.89  | 21.34  | 23.12  | 32.26 | 19.31  | 25.43 |
| <b>Fibrinogen<br/>[g/L]</b>                | 3.45   | 0.93  | 4.51   | 1.19  | 4.26   | 1.77  | 3.06   | 1.58   | 4.10   | 1.97  | 3.36   | 1.48  |
| <b>RDW<br/>[%]</b>                         | 13.37  | 1.30  | 13.87  | 1.37  | 14.06  | 1.50  | 13.67  | 2.44   | 15.18  | 3.35  | 15.26  | 2.46  |
|                                            |        |       |        |       |        |       |        |        |        |       |        |       |

### Modeling of time courses: blood parameters

| Model performance: robust lmer |                  | $R^2_{\text{conditional}}$ | $R^2_{\text{marginal}}$ | ICC  | RMSE    | $\sigma$ |
|--------------------------------|------------------|----------------------------|-------------------------|------|---------|----------|
| Neutrophil Granulocytes        | M0               | 0.35                       | 0.00                    | 0.35 | 9.3     | 9.75     |
|                                | <b>linear</b>    | 0.49                       | 0.2                     | 0.35 | 8.64    | 8.87     |
|                                | quadratic        | 0.46                       | 0.23                    | 0.3  | 8.91    | 9.12     |
|                                | cubic            | 0.45                       | 0.23                    | 0.29 | 8.97    | 9.22     |
| Ferritin                       | M0               | 0.91                       | 0.00                    | 0.91 | 1334.69 | 250.83   |
|                                | linear           | 0.92                       | 0.00                    | 0.92 | 1332.26 | 237.67   |
|                                | <b>quadratic</b> | 0.92                       | 0.01                    | 0.92 | 1313.69 | 236.43   |
|                                | cubic            | 0.92                       | 0.01                    | 0.92 | 1314.07 | 239.62   |
| D-Dimers                       | M0               | 0.71                       | 0.00                    | 0.71 | 3.36    | 0.6      |
|                                | linear           | 0.7                        | 0.00                    | 0.7  | 3.36    | 0.6      |
|                                | quadratic        | 0.7                        | 0.00                    | 0.7  | 3.36    | 0.6      |
|                                | <b>cubic</b>     | 0.67                       | 0.05                    | 0.65 | 3.33    | 0.67     |
| Erythrocytes                   | M0               | 0.76                       | 0.00                    | 0.76 | 0.33    | 0.35     |
|                                | <b>linear</b>    | 0.75                       | 0.00                    | 0.75 | 0.32    | 0.36     |
|                                | quadratic        | 0.76                       | 0.01                    | 0.75 | 0.32    | 0.36     |
|                                | cubic            | 0.76                       | 0.01                    | 0.76 | 0.32    | 0.35     |
| Leukocytes                     | M0               | 0.21                       | 0.00                    | 0.21 | 2.68    | 2.79     |
|                                | linear           | 0.25                       | 0.02                    | 0.24 | 2.62    | 2.7      |
|                                | <b>quadratic</b> | 0.43                       | 0.11                    | 0.36 | 2.26    | 2.39     |
|                                | cubic            | 0.42                       | 0.11                    | 0.35 | 2.26    | 2.42     |
| MCV                            | M0               | 0.93                       | 0.00                    | 0.93 | 1.95    | 1.6      |
|                                | linear           | 0.93                       | 0.01                    | 0.93 | 1.88    | 1.62     |
|                                | <b>quadratic</b> | 0.93                       | 0.01                    | 0.93 | 1.86    | 1.67     |
|                                | cubic            | 0.93                       | 0.01                    | 0.93 | 1.87    | 1.62     |

|                             |               |      |      |      |       |       |
|-----------------------------|---------------|------|------|------|-------|-------|
| <b>MCHC</b>                 | M0            | 0.63 | 0.00 | 0.63 | 0.63  | 0.59  |
|                             | linear        | 0.64 | 0.03 | 0.63 | 0.62  | 0.57  |
|                             | quadratic     | 0.65 | 0.03 | 0.64 | 0.61  | 0.57  |
|                             | <b>cubic</b>  | 0.66 | 0.03 | 0.65 | 0.6   | 0.57  |
| <b>Hematocrit</b>           | M0            | 0.73 | 0.00 | 0.73 | 0.03  | 0.03  |
|                             | linear        | 0.72 | 0.00 | 0.72 | 0.03  | 0.03  |
|                             | quadratic     | 0.72 | 0.00 | 0.72 | 0.03  | 0.03  |
|                             | <b>cubic</b>  | 0.73 | 0    | 0.72 | 0.03  | 0.03  |
| <b>Hemoglobin</b>           | M0            | 0.78 | 0.00 | 0.78 | 0.9   | 0.93  |
|                             | <b>linear</b> | 0.77 | 0.00 | 0.77 | 0.89  | 0.94  |
|                             | quadratic     | 0.77 | 0.00 | 0.77 | 0.89  | 0.95  |
|                             | cubic         | 0.77 | 0.01 | 0.77 | 0.89  | 0.96  |
| <b>MCH</b>                  | M0            | 0.93 | 0.00 | 0.93 | 0.68  | 0.59  |
|                             | linear        | 0.94 | 0.00 | 0.94 | 0.68  | 0.58  |
|                             | quadratic     | 0.94 | 0.00 | 0.94 | 0.65  | 0.59  |
|                             | <b>cubic</b>  | 0.95 | 0.01 | 0.95 | 0.64  | 0.52  |
| <b>Thrombocytes</b>         | M0            | 0.24 | 0.0  | 0.24 | 75.53 | 77.59 |
|                             | linear        | 0.37 | 0.03 | 0.35 | 69    | 69.45 |
|                             | quadratic     | 0.43 | 0.07 | 0.38 | 65.15 | 66.22 |
|                             | <b>cubic</b>  | 0.51 | 0.13 | 0.43 | 57.59 | 62.67 |
| <b>Relative Eosinophils</b> | M0            | 0    | 0.00 | 0.00 | 1.44  | 0.93  |
|                             | linear        | 0.54 | 0.54 | 0.00 | 1.17  | 0.76  |
|                             | quadratic     | 0.55 | 0.55 | 0.00 | 1.17  | 0.76  |
|                             | <b>cubic</b>  | 0.55 | 0.55 | 0    | 1.15  | 0.78  |
| <b>CRP</b>                  | M0            | 0    | 0.00 | 0.00 | 63.18 | 50.04 |
|                             | linear        | 0.25 | 0.11 | 0.15 | 53.2  | 45.82 |

|                   |              |      |      |      |       |       |
|-------------------|--------------|------|------|------|-------|-------|
|                   | quadratic    | 0.59 | 0.28 | 0.43 | 40.67 | 37.11 |
|                   | <b>cubic</b> | 0.63 | 0.32 | 0.46 | 39.6  | 34.91 |
| <b>Fibrinogen</b> | M0           | 0.38 | 0.00 | 0.38 | 1.02  | 1.17  |
|                   | linear       | 0.43 | 0.03 | 0.41 | 0.98  | 1.14  |
|                   | quadratic    | 0.62 | 0.12 | 0.56 | 0.85  | 0.92  |
|                   | <b>cubic</b> | 0.62 | 0.16 | 0.55 | 0.76  | 0.92  |
| <b>RDW</b>        | M0           | 0.69 | 0.00 | 0.69 | 1.42  | 0.77  |
|                   | linear       | 0.69 | 0.04 | 0.68 | 1.36  | 0.78  |
|                   | quadratic    | 0.7  | 0.04 | 0.69 | 1.36  | 0.77  |
|                   | <b>cubic</b> | 0.76 | 0.07 | 0.74 | 1.33  | 0.69  |

*Note.* Model fit robust mixed effects regression models. M0: Intercept-only-Model

### Modeling over time

|                                |                   | <i>Model 1</i> |        |          |          | <i>Model 2</i> |        |          |          | <i>Model 3</i> |        |          |          |
|--------------------------------|-------------------|----------------|--------|----------|----------|----------------|--------|----------|----------|----------------|--------|----------|----------|
|                                |                   | <i>b</i>       | SE     | <i>t</i> | <i>p</i> | <i>b</i>       | SE     | <i>t</i> | <i>p</i> | <i>b</i>       | SE     | <i>t</i> | <i>p</i> |
| <b>Neutrophil Granulocytes</b> | intercept         | 76.83          | 1.52   | 5.41     | <.001    | 76.14          | 1.64   | 46.46    | < .001   | 76.29          | 1.73   | 44.17    | <.001    |
|                                | time              | -.57           | .10    | -5.70    | <.001    | -0.04          | 0.47   | -0.09    | .925     | -0.33          | 1.17   | -0.28    | .782     |
|                                | time <sup>2</sup> |                |        |          |          | -0.02          | 0.02   | -1.19    | .238     | 0.03           | 0.17   | 0.16     | .871     |
|                                | time <sup>3</sup> |                |        |          |          |                |        |          |          | 0.00           | 0.00   | -0.27    | .786     |
| <b>Ferritin</b>                | intercept         | 927.16         | 139.50 | 6.65     | <.001    | 989.97         | 145.14 | 6.82     | < .001   | 1007.19        | 149.96 | 6.72     | <.001    |
|                                | time              | -4.55          | 4.18   | -1.09    | .280     | -31.63         | 12.93  | -2.45    | <.050    | -46.87         | 35.22  | -1.33    | .188     |
|                                | time <sup>2</sup> |                |        |          |          | 1.08           | 0.44   | 2.47     | <.050    | 3.33           | 4.61   | 0.72     | .472     |
|                                | time <sup>3</sup> |                |        |          |          |                |        |          |          | -0.06          | 0.12   | -0.50    | .620     |

|                     |                   |       |     |        |       |       |      |        |       |       |      |        |       |
|---------------------|-------------------|-------|-----|--------|-------|-------|------|--------|-------|-------|------|--------|-------|
| <b>D-Dimers</b>     | intercept         | 1.12  | .16 | 6.99   | <.001 | 1.00  | 0.17 | 6.00   | <.001 | 0.98  | 0.17 | 5.65   | <.001 |
|                     | time              | .00   | .01 | .48    | .631  | 0.10  | 0.03 | 3.49   | <.001 | 0.15  | 0.08 | 1.89   | .062  |
|                     | time <sup>2</sup> |       |     |        |       | 0.00  | 0.00 | -3.52  | <.001 | -0.01 | 0.01 | -0.97  | .335  |
|                     | time <sup>3</sup> |       |     |        |       |       |      |        |       | 0.00  | 0.00 | 0.64   | .522  |
| <b>Erythrocytes</b> | intercept         | 4.10  | .11 | 39.03  | <.001 | 4.09  | 0.11 | 37.69  | <.001 | 4.06  | 0.11 | 36.84  | <.001 |
|                     | time              | -.01  | .00 | -1.38  | .172  | 0.00  | 0.02 | 0.24   | .808  | 0.06  | 0.04 | 1.35   | .181  |
|                     | time <sup>2</sup> |       |     |        |       | 0.00  | 0.00 | -0.56  | .577  | -0.01 | 0.01 | -1.42  | .158  |
|                     | time <sup>3</sup> |       |     |        |       |       |      |        |       | 0.00  | 0.00 | 1.38   | .171  |
| <b>Leukocytes</b>   | intercept         | 7.05  | .39 | 18.15  | <.001 | 6.34  | 0.43 | 14.65  | <.001 | 6.40  | 0.46 | 14.07  | <.001 |
|                     | time              | .05   | .03 | 1.73   | .088  | 0.48  | 0.11 | 4.39   | <.001 | 0.37  | 0.27 | 1.36   | .179  |
|                     | time <sup>2</sup> |       |     |        |       | -0.01 | 0.00 | -4.08  | <.001 | 0.00  | 0.04 | 0.10   | .919  |
|                     | time <sup>3</sup> |       |     |        |       |       |      |        |       | 0.00  | 0.00 | -0.47  | .639  |
| <b>MCV</b>          | intercept         | 89.68 | .96 | 93.88  | <.001 | 89.83 | 0.96 | 93.38  | <.001 | 89.94 | 0.96 | 93.27  | <.001 |
|                     | time              | .05   | .02 | 2.96   | .004  | -0.04 | 0.08 | -0.50  | .622  | -0.28 | 0.19 | -1.48  | .143  |
|                     | time <sup>2</sup> |       |     |        |       | 0.00  | 0.00 | 1.17   | .245  | 0.04  | 0.03 | 1.52   | .133  |
|                     | time <sup>3</sup> |       |     |        |       |       |      |        |       | 0.00  | 0.00 | -1.42  | .160  |
| <b>MCHC</b>         | intercept         | 33.90 | .13 | 254.20 | <.001 | 33.96 | 0.14 | 238.87 | <.001 | 33.98 | 0.15 | 232.48 | <.001 |
|                     | time              | -.02  | .01 | -2.73  | .008  | -0.05 | 0.03 | -1.81  | .074  | -0.10 | 0.07 | -1.57  | .119  |
|                     | time <sup>2</sup> |       |     |        |       | 0.00  | 0.00 | 1.27   | .209  | 0.01  | 0.01 | 1.00   | .321  |
|                     | time <sup>3</sup> |       |     |        |       |       |      |        |       | 0.00  | 0.00 | -0.88  | .382  |
| <b>Hematocrit</b>   | intercept         | .37   | .01 | 44.07  | <.001 | 0.37  | 0.01 | 42.42  | <.001 | 0.37  | 0.01 | 41.17  | <.001 |
|                     | time              | .00   | .00 | -.55   | .584  | 0.00  | 0.00 | 0.09   | .929  | 0.00  | 0.00 | 1.09   | .278  |
|                     | time <sup>2</sup> |       |     |        |       | 0.00  | 0.00 | -0.22  | .830  | 0.00  | 0.00 | -1.17  | .246  |
|                     | time <sup>3</sup> |       |     |        |       |       |      |        |       | 0.00  | 0.00 | 1.15   | .252  |
| <b>Hemoglobin</b>   | intercept         | 12.53 | .29 | 43.08  | <.001 | 12.53 | 0.30 | 41.81  | <.001 | 12.48 | 0.31 | 40.83  | <.001 |
|                     | time              | -.01  | .01 | -1.15  | .253  | -0.01 | 0.05 | -0.14  | .891  | 0.08  | 0.11 | 0.71   | .482  |
|                     | time <sup>2</sup> |       |     |        |       | 0.00  | 0.00 | -0.12  | .908  | -0.01 | 0.02 | -0.86  | .394  |

|                             |                   |        |       |       |       |        |       |       |       |        |       |       |       |
|-----------------------------|-------------------|--------|-------|-------|-------|--------|-------|-------|-------|--------|-------|-------|-------|
|                             | time <sup>3</sup> |        |       |       |       |        |       |       |       | 0.00   | 0.00  | 0.85  | .396  |
| <b>MCH</b>                  | intercept         | 3.35   | .35   | 86.44 | <.001 | 30.45  | 0.36  | 85.62 | <.001 | 30.51  | 0.36  | 85.91 | <.001 |
|                             | time              | .01    | .01   | .97   | .335  | -0.05  | 0.03  | -1.90 | .061  | -0.20  | 0.06  | -3.36 | .001  |
|                             | time <sup>2</sup> |        |       |       |       | 0.00   | 0.00  | 2.18  | <.050 | 0.03   | 0.01  | 2.97  | .004  |
|                             | time <sup>3</sup> |        |       |       |       |        |       |       |       | 0.00   | 0.00  | -2.77 | .007  |
| <b>Thrombocytes</b>         | intercept         | 208.54 | 11.35 | 18.38 | <.001 | 195.82 | 12.28 | 15.94 | <.001 | 182.29 | 12.65 | 14.41 | <.001 |
|                             | time              | 1.47   | .69   | 2.11  | .038  | 9.37   | 3.07  | 3.05  | <.010 | 34.71  | 7.11  | 4.88  | <.001 |
|                             | time <sup>2</sup> |        |       |       |       | -0.26  | 0.10  | -2.61 | <.050 | -4.33  | 1.04  | -4.16 | <.001 |
|                             | time <sup>3</sup> |        |       |       |       |        |       |       |       | 0.11   | 0.03  | 3.93  | <.001 |
| <b>Relative Eosinophils</b> | intercept         | .25    | .09   | 2.74  | .008  | 0.28   | 0.11  | 2.49  | .015  | 0.21   | 0.12  | 1.68  | .098  |
|                             | time              | .09    | .01   | 1.54  | <.001 | 0.07   | 0.04  | 1.86  | .067  | 0.22   | 0.09  | 2.38  | .020  |
|                             | time <sup>2</sup> |        |       |       |       | 0.00   | 0.00  | 0.48  | .630  | -0.02  | 0.01  | -1.71 | .091  |
|                             | time <sup>3</sup> |        |       |       |       |        |       |       |       | 0.00   | 0.00  | 1.75  | .084  |
| <b>CRP</b>                  | intercept         | 59.63  | 5.58  | 1.69  | <.001 | 83.03  | 6.91  | 12.02 | <.001 | 91.23  | 7.12  | 12.82 | <.001 |
|                             | time              | -2.50  | .56   | -4.45 | <.001 | -12.51 | 1.41  | -8.85 | <.001 | -21.74 | 3.38  | -6.42 | <.001 |
|                             | time <sup>2</sup> |        |       |       |       | 0.34   | 0.05  | 7.15  | <.001 | 1.67   | 0.46  | 3.64  | <.001 |
|                             | time <sup>3</sup> |        |       |       |       |        |       |       |       | -0.03  | 0.01  | -2.90 | .005  |
| <b>Fibrinogen</b>           | intercept         | 4.03   | .31   | 13.01 | <.001 | 4.44   | 0.33  | 13.33 | <.001 | 4.78   | 0.36  | 13.34 | <.001 |
|                             | time              | -.03   | .02   | -1.47 | .150  | -0.23  | 0.07  | -3.41 | <.010 | -0.61  | 0.17  | -3.59 | .001  |
|                             | time <sup>2</sup> |        |       |       |       | 0.01   | 0.00  | 3.09  | <.010 | 0.06   | 0.02  | 2.79  | .009  |
|                             | time <sup>3</sup> |        |       |       |       |        |       |       |       | 0.00   | 0.00  | -2.53 | .016  |
| <b>RDW</b>                  | intercept         | 13.63  | .20   | 68.34 | <.001 | 13.68  | 0.21  | 66.22 | <.001 | 13.79  | 0.21  | 66.20 | <.001 |
|                             | time              | .03    | .01   | 3.34  | .001  | 0.00   | 0.04  | -0.10 | .917  | -0.23  | 0.08  | -2.85 | .005  |
|                             | time <sup>2</sup> |        |       |       |       | 0.00   | 0.00  | 0.86  | .392  | 0.04   | 0.01  | 3.28  | .002  |
|                             | time <sup>3</sup> |        |       |       |       |        |       |       |       | 0.00   | 0.00  | -3.23 | .002  |

*Note.* Parameter estimation by robust linear mixed effects regression model (Koller, M. robustlmm: An R Package for Robust Estimation of Linear Mixed-Effects Models. J. Stat. Softw. 2016, 75, 1–24. <https://doi.org/10.18637/jss.v075.i06>.). Model 1 linear prediction of concentration of blood parameter by time (0, 2, 5, 10, 30). Model quadratic prediction of concentration of blood parameters by time (0, 2, 5, 10, 30). Model of cubic prediction of concentration of blood parameters by time (0, 2, 5, 10, 30).

### Blood parameters: CON vs. EG

Overall statistics: sign. result suggests a significant difference between trimmed means across control group and different time points (aCOV)

|                     |                                                |             |
|---------------------|------------------------------------------------|-------------|
| <b>Neutrophils</b>  | F(5, 26.46) = 9.72, $\xi$ = 0.67 [0.47; 0.87]  | $p < .001$  |
| <b>Erythrocytes</b> | F(5, 27.85) = 3.09, $\xi$ = 0.45 [0.25; 0.64]  | $p < .050$  |
| <b>Leukocytes</b>   | F(5, 28.41) = 2.87, $\xi$ = 0.55 [0.31; 0.92]  | $p < .050$  |
| <b>MCV</b>          | F(5, 28.39) = 0.941, $\xi$ = 0.50 [0.18; 0.68] | $p = .470$  |
| <b>MCHC</b>         | F(5, 29.03) = 3.32, $\xi$ = 0.53 [0.29; 0.77]  | $p < .050$  |
| <b>Hemoglobin</b>   | F(5, 27.6) = 6.08, $\xi$ = 0.5 [0.28; 0.67]    | $p < .001$  |
| <b>Hematocrit</b>   | F(5, 27.87) = 3.87, $\xi$ = 0.47 [0.27; 0.67]  | $p < .010$  |
| <b>MCH</b>          | F(5, 28.56) = 1.11, $\xi$ = 0.38 [0.19; 0.6]   | $p = .376$  |
| <b>Thrombocytes</b> | F(5, 8.89) = 3.92, $\xi$ = 0.47 [0.22; 0.78]   | $p < .010$  |
| <b>Eosinophils</b>  | F(5, 21.43) = 15.38, $\xi$ = 0.7 [0.45; 1.09]  | $p < .001$  |
| <b>RDW</b>          | F(5, 27.74) = 2.55, $\xi$ = 0.53 [0.27; 0.91]  | $p = .051,$ |
| <b>Fibrinogen</b>   | F(5, 12.61) = 2.55, $\xi$ = 0.61 [0.34; 0.99]  | $p = .083$  |
| <b>D-Dimers</b>     | F(5, 24.19) = 4.06, $\xi$ = 1.06 [0.39; 3],    | $p < .010$  |

(<https://doi.org/10.3758/s13428-019-01246-w>; effect size=  $\xi$  [95%-bootstrap CI]: 0.1 small, 0.3 medium, 0.5 large). Overall statistic calculated using WRS2 (Mair, & Wilcox)



|                                |                 | <i>b</i> | <i>SE</i> | 95%-CI-low | 95%-CI-high | <i>t</i> | <i>df</i> <sub>error</sub> | <i>p</i> |
|--------------------------------|-----------------|----------|-----------|------------|-------------|----------|----------------------------|----------|
| <b>Neutrophil Granulocytes</b> | (Intercept)     | 59.23    | 2.24      | 54.79      | 63.67       | 26.39    | 127                        | <.001    |
|                                | CON_vs_aCOV T0  | 17.22    | 3.02      | 11.25      | 23.20       | 5.70     | 127                        | <.001    |
|                                | CON_vs_aCOV T2  | 19.05    | 3.66      | 11.80      | 26.30       | 5.20     | 127                        | <.001    |
|                                | CON_vs_aCOV T5  | 14.74    | 3.60      | 7.61       | 21.87       | 4.09     | 127                        | <.001    |
|                                | CON_vs_aCOV T10 | 18.83    | 5.15      | 8.63       | 29.03       | 3.65     | 127                        | <.001    |
|                                | CON_vs_aCOV T30 | -3.31    | 4.37      | -11.96     | 5.33        | -0.76    | 127                        | .45      |
| <b>Erythrocytes</b>            | (Intercept)     | 4.49     | 0.12      | 4.26       | 4.73        | 37.47    | 147                        | <.001    |
|                                | CON_vs_aCOV T0  | -0.38    | 0.16      | -0.70      | -0.07       | -2.40    | 147                        | .02      |
|                                | CON_vs_aCOV T2  | -0.72    | 0.19      | -1.10      | -0.35       | -3.79    | 147                        | <.001    |
|                                | CON_vs_aCOV T5  | -0.39    | 0.18      | -0.75      | -0.04       | -2.20    | 147                        | .03      |
|                                | CON_vs_aCOV T10 | -0.68    | 0.26      | -1.19      | -0.18       | -2.66    | 147                        | .01      |
|                                | CON_vs_aCOV T30 | -0.60    | 0.21      | -1.01      | -0.18       | -2.86    | 147                        | <.001    |
| <b>Leukocytes</b>              | (Intercept)     | 6.10     | 0.53      | 5.05       | 7.15        | 11.52    | 147                        | <.001    |
|                                | CON_vs_aCOV T0  | 0.10     | 0.71      | -1.30      | 1.50        | 0.14     | 147                        | .89      |
|                                | CON_vs_aCOV T2  | 0.42     | 0.85      | -1.26      | 2.09        | 0.49     | 147                        | .62      |
|                                | CON_vs_aCOV T5  | 2.25     | 0.79      | 0.70       | 3.81        | 2.86     | 147                        | <.001    |
|                                | CON_vs_aCOV T10 | 3.52     | 1.17      | 1.20       | 5.83        | 3.00     | 147                        | <.001    |
|                                | CON_vs_aCOV T30 | 1.28     | 0.93      | -0.55      | 3.12        | 1.38     | 147                        | .17      |
| <b>MCV</b>                     | (Intercept)     | 89.94    | 1.31      | 87.36      | 92.53       | 68.69    | 147                        | <.001    |
|                                | CON_vs_aCOV T0  | -0.48    | 1.74      | -3.93      | 2.96        | -0.28    | 147                        | .78      |
|                                | CON_vs_aCOV T2  | -1.38    | 2.14      | -5.61      | 2.85        | -0.65    | 147                        | .52      |
|                                | CON_vs_aCOV T5  | -2.08    | 1.96      | -5.96      | 1.80        | -1.06    | 147                        | .29      |
|                                | CON_vs_aCOV T10 | 0.81     | 2.78      | -4.68      | 6.29        | 0.29     | 147                        | .77      |
|                                | CON_vs_aCOV T30 | 3.44     | 2.32      | -1.15      | 8.03        | 1.48     | 147                        | .14      |
| <b>MCHC</b>                    | (Intercept)     | 34.60    | 0.18      | 34.24      | 34.96       | 189.62   | 147                        | <.001    |
|                                | CON_vs_aCOV T0  | -0.62    | 0.24      | -1.09      | -0.15       | -2.59    | 147                        | .01      |
|                                | CON_vs_aCOV T2  | -0.96    | 0.29      | -1.53      | -0.39       | -3.31    | 147                        | <.001    |

|                             |                 |        |       |         |        |       |     |       |
|-----------------------------|-----------------|--------|-------|---------|--------|-------|-----|-------|
|                             | CON_vs_aCOV T5  | -0.63  | 0.27  | -1.16   | -0.11  | -2.37 | 147 | .02   |
|                             | CON_vs_aCOV T10 | -0.93  | 0.38  | -1.68   | -0.18  | -2.46 | 147 | .02   |
|                             | CON_vs_aCOV T30 | -1.31  | 0.32  | -1.94   | -0.69  | -4.16 | 147 | <.001 |
| <b>Hematocrit</b>           | (Intercept)     | 0.40   | 0.01  | 0.38    | 0.43   | 34.88 | 147 | <.001 |
|                             | CON_vs_aCOV T0  | -0.03  | 0.02  | -0.07   | 0.00   | -2.25 | 147 | .03   |
|                             | CON_vs_aCOV T2  | -0.06  | 0.02  | -0.10   | -0.03  | -3.49 | 147 | <.001 |
|                             | CON_vs_aCOV T5  | -0.04  | 0.02  | -0.08   | -0.01  | -2.50 | 147 | .01   |
|                             | CON_vs_aCOV T10 | -0.06  | 0.02  | -0.11   | -0.01  | -2.24 | 147 | .03   |
|                             | CON_vs_aCOV T30 | -0.04  | 0.02  | -0.08   | 0.00   | -1.85 | 147 | .07   |
| <b>Hemoglobin</b>           | (Intercept)     | 13.97  | 0.40  | 13.17   | 14.77  | 34.51 | 147 | <.001 |
|                             | CON_vs_aCOV T0  | -1.41  | 0.54  | -2.47   | -0.35  | -2.64 | 147 | .01   |
|                             | CON_vs_aCOV T2  | -2.59  | 0.64  | -3.86   | -1.32  | -4.03 | 147 | <.001 |
|                             | CON_vs_aCOV T5  | -1.71  | 0.60  | -2.91   | -0.52  | -2.83 | 147 | .01   |
|                             | CON_vs_aCOV T10 | -2.27  | 0.87  | -3.98   | -0.56  | -2.62 | 147 | .01   |
|                             | CON_vs_aCOV T30 | -1.83  | 0.71  | -3.23   | -0.43  | -2.58 | 147 | .01   |
| <b>MCH</b>                  | (Intercept)     | 31.04  | 0.46  | 30.14   | 31.95  | 67.93 | 147 | <.001 |
|                             | CON_vs_aCOV T0  | -0.49  | 0.60  | -1.67   | 0.69   | -0.82 | 147 | .42   |
|                             | CON_vs_aCOV T2  | -1.04  | 0.72  | -2.46   | 0.37   | -1.45 | 147 | .15   |
|                             | CON_vs_aCOV T5  | -1.09  | 0.67  | -2.41   | 0.23   | -1.63 | 147 | .10   |
|                             | CON_vs_aCOV T10 | -0.47  | 0.94  | -2.34   | 1.39   | -0.50 | 147 | .62   |
|                             | CON_vs_aCOV T30 | 0.04   | 0.78  | -1.49   | 1.58   | 0.06  | 147 | .96   |
| <b>Thrombocytes</b>         | (Intercept)     | 236.14 | 17.01 | 202.51  | 269.76 | 13.88 | 147 | <.001 |
|                             | CON_vs_aCOV T0  | -48.79 | 22.61 | -93.47  | -4.10  | -2.16 | 147 | .03   |
|                             | CON_vs_aCOV T2  | -14.83 | 27.07 | -68.33  | 38.66  | -0.55 | 147 | .58   |
|                             | CON_vs_aCOV T5  | 14.22  | 26.44 | -38.03  | 66.46  | 0.54  | 147 | .59   |
|                             | CON_vs_aCOV T10 | -29.58 | 36.38 | -101.47 | 42.32  | -0.81 | 147 | .42   |
|                             | CON_vs_aCOV T30 | -0.22  | 29.77 | -59.05  | 58.61  | -0.01 | 147 | .99   |
| <b>Relative Eosinophils</b> | (Intercept)     | 1.65   | 0.15  | 1.35    | 1.95   | 10.90 | 127 | <.001 |

|                   |                 |       |      |       |       |       |     |       |
|-------------------|-----------------|-------|------|-------|-------|-------|-----|-------|
|                   | CON_vs_aCOV T0  | -1.44 | 0.20 | -1.84 | -1.05 | -7.17 | 127 | <.001 |
|                   | CON_vs_aCOV T2  | -1.39 | 0.26 | -1.91 | -0.87 | -5.30 | 127 | <.001 |
|                   | CON_vs_aCOV T5  | -0.89 | 0.24 | -1.37 | -0.40 | -3.64 | 127 | <.001 |
|                   | CON_vs_aCOV T10 | -0.96 | 0.33 | -1.62 | -0.30 | -2.87 | 127 | <.001 |
|                   | CON_vs_aCOV T30 | 1.23  | 0.35 | 0.53  | 1.93  | 3.47  | 127 | <.001 |
| <b>RDW</b>        | (Intercept)     | 13.23 | 0.22 | 12.79 | 13.66 | 60.21 | 147 | <.001 |
|                   | CON_vs_aCOV T0  | 0.49  | 0.29 | -0.09 | 1.06  | 1.68  | 147 | .09   |
|                   | CON_vs_aCOV T2  | 0.52  | 0.35 | -0.18 | 1.21  | 1.47  | 147 | .14   |
|                   | CON_vs_aCOV T5  | 0.01  | 0.33 | -0.64 | 0.67  | 0.04  | 147 | .97   |
|                   | CON_vs_aCOV T10 | 0.99  | 0.48 | 0.05  | 1.94  | 2.08  | 147 | .04   |
|                   | CON_vs_aCOV T30 | 1.33  | 0.39 | 0.56  | 2.09  | 3.41  | 147 | <.001 |
| <b>Fibrinogen</b> | (Intercept)     | 3.30  | 0.29 | 2.74  | 3.87  | 11.58 | 79  | <.001 |
|                   | CON_vs_aCOV T0  | 1.20  | 0.56 | 0.08  | 2.32  | 2.14  | 79  | .04   |
|                   | CON_vs_aCOV T2  | 0.56  | 0.55 | -0.54 | 1.65  | 1.01  | 79  | .31   |
|                   | CON_vs_aCOV T5  | -0.63 | 0.57 | -1.77 | 0.51  | -1.10 | 79  | .27   |
|                   | CON_vs_aCOV T10 | 0.73  | 0.92 | -1.10 | 2.56  | 0.79  | 79  | .43   |
|                   | CON_vs_aCOV T30 | 0.45  | 0.74 | -1.01 | 1.92  | 0.62  | 79  | .54   |
| <b>D-Dimers</b>   | (Intercept)     | 0.42  | 0.14 | 0.14  | 0.70  | 2.98  | 145 | <.001 |
|                   | CON_vs_aCOV T0  | 0.33  | 0.19 | -0.05 | 0.71  | 1.73  | 145 | .09   |
|                   | CON_vs_aCOV T2  | 0.37  | 0.22 | -0.06 | 0.80  | 1.70  | 145 | .09   |
|                   | CON_vs_aCOV T5  | 0.65  | 0.26 | 0.13  | 1.16  | 2.49  | 145 | .01   |
|                   | CON_vs_aCOV T10 | 0.87  | 0.32 | 0.23  | 1.50  | 2.69  | 145 | .01   |
|                   | CON_vs_aCOV T30 | 0.62  | 0.35 | -0.07 | 1.31  | 1.79  | 145 | .08   |

Table S2

## Descriptive Statistics and statistical results of hemorheological variables

|                        | CON    |        | aCOV T0 |        | aCOV T2 |        | aCOV T5 |        | aCOV T10 |        | aCOV T30 |       |
|------------------------|--------|--------|---------|--------|---------|--------|---------|--------|----------|--------|----------|-------|
|                        | M      | SD     | M       | SD     | M       | SD     | M       | SD     | M        | SD     | M        | SD    |
| <b>EI max [au]</b>     | 0.50   | 0.02   | 0.49    | 0.02   | 0.48    | 0.03   | 0.47    | 0.03   | 0.47     | 0.04   | 0.49     | 0.03  |
| <b>SS ½</b>            | 1.23   | 0.20   | 1.15    | 0.23   | 1.09    | 0.19   | 1.07    | 0.21   | 1.12     | 0.27   | 1.13     | 0.19  |
| <b>SS ½ EI max</b>     | 2.47   | 0.34   | 2.36    | 0.43   | 2.27    | 0.32   | 2.25    | 0.36   | 2.33     | 0.47   | 2.31     | 0.30  |
| <b>Isc max</b>         | 34.25  | 5.69   | 34.71   | 6.63   | 35.57   | 7.24   | 37.72   | 5.39   | 34.51    | 4.29   | 36.07    | 4.46  |
| <b>AI [%]</b>          | 59.01  | 7.41   | 65.83   | 7.27   | 62.46   | 11.21  | 58.25   | 11.98  | 59.21    | 11.15  | 59.47    | 8.37  |
| <b>Shr at dIsc min</b> | 154.83 | 152.91 | 326.69  | 206.78 | 260.13  | 115.41 | 258.60  | 210.55 | 246.88   | 159.18 | 173.33   | 89.30 |
| <b>T ½ (1/s)</b>       | 2.77   | 1.02   | 1.92    | 0.77   | 2.44    | 1.35   | 2.99    | 1.98   | 2.96     | 1.65   | 2.73     | 1.11  |

## Time differences- Time as factor

## Deformability

## EI max

$F(5, 36.79) = 4.38, p < .001, ES = 0.42 [0.23, 0.63]$

|                        | <i>b</i> | <i>SE</i> | 95 % - CI | 95 %- CI | <i>t</i> | df <sub>error</sub> | <i>p</i> |
|------------------------|----------|-----------|-----------|----------|----------|---------------------|----------|
| <b>(Intercept)</b>     | 0.5      | 0         | 0.49      | 0.5      | 124.25   | 184                 | <.001    |
| <b>CON_vs_aCOV T0</b>  | -0.01    | 0.01      | -0.02     | 0        | -1.47    | 184                 | .145     |
| <b>CON_vs_aCOV T2</b>  | -0.02    | 0.01      | -0.03     | 0        | -2.78    | 184                 | .006     |
| <b>CON_vs_aCOV T5</b>  | -0.02    | 0.01      | -0.04     | -0.01    | -3.86    | 184                 | <.001    |
| <b>CON_vs_aCOV T10</b> | -0.02    | 0.01      | -0.04     | -0.01    | -3.14    | 184                 | .002     |
| <b>CON_vs_aCOV T30</b> | -0.01    | 0.01      | -0.03     | 0.01     | -1.01    | 184                 | .315     |

SS ½

F (5, 38.3) = 2.36, p = .059, ES = 0.38 [0.18; 0.6]

|                 | <i>b</i> | <i>SE</i> | 95 % - CI | 95 %- CI | <i>t</i> | df <sub>error</sub> | <i>p</i> |
|-----------------|----------|-----------|-----------|----------|----------|---------------------|----------|
| (Intercept)     | 1.23     | 0.03      | 1.16      | 1.29     | 37.88    | 184                 | <.001    |
| CON_vs_aCOV T0  | -0.08    | 0.05      | -0.17     | 0.02     | -1.61    | 184                 | .110     |
| CON_vs_aCOV T2  | -0.13    | 0.05      | -0.23     | -0.04    | -2.85    | 184                 | .005     |
| CON_vs_aCOV T5  | -0.16    | 0.05      | -0.25     | -0.06    | -3.2     | 184                 | .002     |
| CON_vs_aCOV T10 | -0.11    | 0.06      | -0.22     | 0        | -1.92    | 184                 | .056     |
| CON_vs_aCOV T30 | -0.1     | 0.07      | -0.23     | 0.04     | -1.37    | 184                 | .173     |

SS ½ / EI max Ratio

F( 5, 38.51) = 1.55, p= .199, ES = 0.36 [0.16; 0.6]

|                 | <i>b</i> | <i>SE</i> | 95 % - CI | 95 %- CI | <i>t</i> | df <sub>error</sub> | <i>p</i> |
|-----------------|----------|-----------|-----------|----------|----------|---------------------|----------|
| (Intercept)     | 2.47     | 0.06      | 2.36      | 2.58     | 43.86    | 184                 | <.001    |
| CON_vs_aCOV T0  | -0.11    | 0.08      | -0.27     | 0.05     | -1.35    | 184                 | .177     |
| CON_vs_aCOV T2  | -0.2     | 0.08      | -0.36     | -0.04    | -2.44    | 184                 | .016     |
| CON_vs_aCOV T5  | -0.22    | 0.09      | -0.39     | -0.05    | -2.55    | 184                 | .012     |
| CON_vs_aCOV T10 | -0.14    | 0.1       | -0.33     | 0.06     | -1.38    | 184                 | .171     |
| CON_vs_aCOV T30 | -0.16    | 0.12      | -0.4      | 0.08     | -1.29    | 184                 | .197     |

Robust Models: Changes over time

|  | <i>b</i> | SE | <i>t</i> | <i>p</i> | <i>R</i> <sup>2</sup> cond. [marginal] | RMSE |
|--|----------|----|----------|----------|----------------------------------------|------|
|--|----------|----|----------|----------|----------------------------------------|------|

|                    |                   |          |         |           |        |               |       |
|--------------------|-------------------|----------|---------|-----------|--------|---------------|-------|
| <b>EI max</b>      | (Intercept)       | 0.48664  | 0.00350 | 138.99710 | .00000 | 0.363 [0.031] | 0.020 |
|                    | time              | -0.00190 | 0.00076 | -2.48783  | .01431 |               |       |
|                    | time <sup>2</sup> | 0.00006  | 0.00003 | 2.41461   | .01734 |               |       |
| <b>SS ½</b>        | (Intercept)       | 1.11130  | 0.02669 | 41.64450  | .00000 | 0.375 [0.009] | 0.152 |
|                    | time              | -0.00637 | 0.00570 | -1.11842  | .26579 |               |       |
|                    | time <sup>2</sup> | 0.00024  | 0.00019 | 1.29852   | .19676 |               |       |
| <b>SS ½ EI max</b> | (Intercept)       | 2.28658  | 0.04548 | 50.27441  | .00000 | 0.416 [0.004] | 0.256 |
|                    | time              | -0.00553 | 0.00931 | -0.59353  | .55404 |               |       |
|                    | time <sup>2</sup> | 0.00023  | 0.00031 | 0.74956   | .45510 |               |       |

*Note. Robust linear mixed effects regression models for aggregation parameters. Sign. quadratic change in EI max, No sign. change in SS ½, SS ½/EI max*

#### Robust Models: Cubic

|                        |                   | <i>b</i> | SE      | <i>t</i> | <i>p</i> | <i>R</i> <sup>2</sup> cond. [marginal] | <i>RMSE</i> |
|------------------------|-------------------|----------|---------|----------|----------|----------------------------------------|-------------|
| <b>EI max</b>          | (Intercept)       | 0.489    | 0.004   | 127.573  | 0.00000  | 0.352 [0.040]                          | 0.019       |
|                        | time              | -0.004   | 0.002   | -2.171   | 0.032    |                                        |             |
|                        | time <sup>2</sup> | 0.000    | 0.000   | 1.551    | 0.124    |                                        |             |
|                        | time <sup>3</sup> | 0.000    | 0.000   | -1.329   | 0.186    |                                        |             |
| <b>SS ½ individual</b> | (Intercept)       | 1.12857  | 0.02917 | 38.68386 | 0.00000  | 0.373[0.019]                           | 0.150       |
|                        | time              | -0.02784 | 0.01530 | -1.81964 | 0.07155  |                                        |             |
|                        | time <sup>2</sup> | 0.00335  | 0.00204 | 1.64409  | 0.10303  |                                        |             |
|                        | time <sup>3</sup> | -0.00008 | 0.00005 | -1.53691 | 0.12720  |                                        |             |
| <b>SS ½/EI max</b>     | (Intercept)       | 2.31328  | 0.04929 | 46.93515 | 0.00000  | 0.409 [0.013]                          | 0.254       |
|                        | time              | -0.03859 | 0.02502 | -1.54226 | 0.12594  |                                        |             |
|                        | time <sup>2</sup> | 0.00501  | 0.00334 | 1.50154  | 0.13613  |                                        |             |
|                        | time <sup>3</sup> | -0.00012 | 0.00009 | -1.44314 | 0.15187  |                                        |             |

### Aggregation:

#### Isc max (au)

Difference between CON and aCOV T0, aCOV T2, aCOV T5, aCOV T10, aCOV T30. Assumptions of linear regression visually checked => can be assumed

$F(5, 40.6) = 1.28$ ,  $p = .292$ ,  $ES = 0.34$  [0.16; 0.53]

|                 | <i>b</i> | <i>SE</i> | 95 % - CI | 95 %- CI | <i>t</i> | df <sub>error</sub> | <i>p</i> |
|-----------------|----------|-----------|-----------|----------|----------|---------------------|----------|
| (Intercept)     | 34.25    | 0.83      | 32.61     | 35.89    | 41.22    | 183                 | <.001    |
| CON_vs_aCOV T0  | 0.39     | 1.22      | -2.02     | 2.8      | 0.32     | 183                 | .749     |
| CON_vs_aCOV T2  | 2.38     | 1.24      | -0.06     | 4.83     | 1.92     | 183                 | .056     |
| CON_vs_aCOV T5  | 2.73     | 1.27      | 0.22      | 5.24     | 2.15     | 183                 | .033     |
| CON_vs_aCOV T10 | 0.14     | 1.5       | -2.82     | 3.1      | 0.09     | 183                 | .925     |
| CON_vs_aCOV T30 | 1.82     | 1.84      | -1.81     | 5.45     | 0.99     | 183                 | .324     |

#### AI (%)

Difference between CON and aCOV T0, aCOV T2, aCOV T5, aCOV T10, aCOV T30. Assumptions of linear regression visually checked: not given, robust models.

$F(5, 36.76) = 3.95$ ,  $p < .001$ ,  $ES = 0.4$  [0.22; 0.59]

|                | <i>b</i> | <i>SE</i> | 95 % - CI | 95 %- CI | <i>t</i> | df <sub>error</sub> | <i>p</i> |
|----------------|----------|-----------|-----------|----------|----------|---------------------|----------|
| (Intercept)    | 59.11    | 1.43      | 56.3      | 61.93    | 41.44    | 183                 | <.001    |
| CON_vs_aCOV T0 | 6.72     | 2.07      | 2.64      | 10.8     | 3.25     | 183                 | .001     |
| CON_vs_aCOV T2 | 3.24     | 2.12      | -0.95     | 7.42     | 1.53     | 183                 | .129     |
| CON_vs_aCOV T5 | 1.24     | 2.2       | -3.11     | 5.58     | 0.56     | 183                 | .576     |

|                        |      |      |       |      |      |     |      |
|------------------------|------|------|-------|------|------|-----|------|
| <b>CON_vs_aCOV T10</b> | 0.93 | 2.67 | -4.34 | 6.2  | 0.35 | 183 | .728 |
| <b>CON_vs_aCOV T30</b> | 0.35 | 3.16 | -5.87 | 6.58 | 0.11 | 183 | .911 |

## Multilevel models:

Prediction of AI by ZP. Analyzed using multilevel model.

Assumptions of linear regression visually checked. No NV of residuals available.

Robust linear mixed effects regression (Koller, M. robustlmm: An R Package for Robust Estimation of Linear Mixed-Effects Models. J. Stat. Softw. 2016, 75, 1–24. <https://doi.org/10.18637/jss.v075.i06>). P-values calculated from t-statistics of the robust estimate and df of the equivalent "normal" model.

### Shr at dIsc min (1/s)

Difference between CON and aCOV T0, aCOV T2, aCOV T5, aCOV T10, aCOV T30. Assumptions of linear regression visually checked cannot be assumed; use robust model.

$F(5, 34.12) = 17.64$ ,  $p < .001$ ,  $ES = 0.48$  [0.32; 0.75]

|                        | <i>b</i> | <i>SE</i> | 95 % - CI | 95 %- CI | <i>t</i> | df <sub>error</sub> | <i>p</i> |
|------------------------|----------|-----------|-----------|----------|----------|---------------------|----------|
| <b>(Intercept)</b>     | 119.67   | 19.27     | 81.65     | 157.68   | 6.21     | 183                 | <.001    |
| <b>CON_vs_aCOV T0</b>  | 139.41   | 29.52     | 81.17     | 197.64   | 4.72     | 183                 | <.001    |
| <b>CON_vs_aCOV T2</b>  | 131.85   | 27.78     | 77.04     | 186.65   | 4.75     | 183                 | <.001    |
| <b>CON_vs_aCOV T5</b>  | 70.5     | 31.04     | 9.25      | 131.75   | 2.27     | 183                 | .024     |
| <b>CON_vs_aCOV T10</b> | 98.1     | 34.56     | 29.92     | 166.28   | 2.84     | 183                 | .005     |
| <b>CON_vs_aCOV T30</b> | 53.67    | 41.95     | -29.11    | 136.44   | 1.28     | 183                 | .202     |



**T ½ [1/s]**

Difference between CON and aCOV T0, aCOV T2, aCOV T5, aCOV T10, aCOV T30. Assumptions of linear regression visually verified not given: interpret robust model.  $F(5, 36.8) = 4.79$ ,  $p < .010$ ,  $ES = 0.42$  [0.22; 0.66]

|                        | <i>b</i> | <i>SE</i> | 95 % - CI | 95 %- CI | <i>t</i> | df <sub>error</sub> | <i>p</i> |
|------------------------|----------|-----------|-----------|----------|----------|---------------------|----------|
| <b>(Intercept)</b>     | 2.77     | 0.2       | 2.37      | 3.16     | 13.64    | 183                 | <.001    |
| <b>CON_vs_aCOV T0</b>  | -0.85    | 0.29      | -1.43     | -0.27    | -2.89    | 183                 | .004     |
| <b>CON_vs_aCOV T2</b>  | -0.32    | 0.3       | -0.91     | 0.26     | -1.09    | 183                 | .277     |
| <b>CON_vs_aCOV T5</b>  | 0.23     | 0.31      | -0.38     | 0.83     | 0.75     | 183                 | .456     |
| <b>CON_vs_aCOV T10</b> | 0.2      | 0.36      | -0.52     | 0.91     | 0.54     | 183                 | .590     |
| <b>CON_vs_aCOV T30</b> | -0.04    | 0.44      | -0.9      | 0.83     | -0.08    | 183                 | .935     |

### Time development: Aggregation

## Multilevel models:

Prediction of AV by ZP and ZP<sup>2</sup>. Analyzed by multilevel model.

Assumptions of linear regression visually checked. No NV of the residuals available. Robust linear mixed effects regression (Koller, M. robustlmm: An R Package for Robust Estimation of Linear Mixed-Effects Models. J. Stat. Softw. 2016, 75, 1–24. <https://doi.org/10.18637/jss.v075.i06>). P-values calculated from t-statistics of the robust estimate and df of the equivalent "normal" model.

### Quadratic Models

|                        |                   | <i>b</i> | SE     | <i>t</i> | <i>p</i> | <i>R</i> <sup>2</sup> cond.<br>[marginal] | <i>RMSE</i> |
|------------------------|-------------------|----------|--------|----------|----------|-------------------------------------------|-------------|
| <b>Isc max</b>         | (Intercept)       | 35.236   | 0.840  | 41.928   | < .001   | .543 [.009]                               | 4.238       |
|                        | time              | 0.217    | 0.151  | 1.435    | .154     |                                           |             |
|                        | time <sup>2</sup> | -0.008   | 0.005  | -1.527   | .130     |                                           |             |
| <b>AI [%]</b>          | (Intercept)       | 65.040   | 1.466  | 44.373   | < .001   | .615 [.057]                               | 6.915       |
|                        | time              | -0.968   | 0.247  | -3.917   | < .001   |                                           |             |
|                        | time <sup>2</sup> | 0.027    | 0.008  | 3.235    | < .010   |                                           |             |
| <b>Shr at dIsc min</b> | (Intercept)       | 278.321  | 19.077 | 14.589   | < .001   | .535 [.054]                               | 132.494     |
|                        | time              | -11.015  | 3.583  | -3.074   | < .010   |                                           |             |
|                        | time <sup>2</sup> | 0.271    | 0.118  | 2.290    | < .050   |                                           |             |
| <b>T ½ (1/s)</b>       | (Intercept)       | 2.003    | 0.170  | 11.748   | < .001   | .590 [.065]                               | 0.993       |
|                        | time              | 0.122    | 0.030  | 4.048    | < .001   |                                           |             |
|                        | time <sup>2</sup> | -0.003   | 0.001  | -3.338   | < .001   |                                           |             |

*Note. Robust linear mixed effects regression models for aggregation parameters*

Significant quadratic time effect for AI, Shr at Disc and t ½ could be found, indicating a quadratic change of these parameters over time.

For Isc max there was no sign. effect of time: on average no change of Isc max over time could be found

### Cubic Models:

|                |             | <i>b</i> | SE   | <i>t</i> | <i>p</i> | <i>R</i> <sup>2</sup> cond.<br>[marginal] | <i>RMSE</i> |
|----------------|-------------|----------|------|----------|----------|-------------------------------------------|-------------|
| <b>Isc max</b> | (Intercept) | 34.5     | 0.88 | 39.26    | <.001    | 0.556[0.027]                              | 4.183       |
|                | time        | 1.04     | 0.4  | 2.63     | .010     |                                           |             |

|                        |                   |        |       |       |       |               |         |
|------------------------|-------------------|--------|-------|-------|-------|---------------|---------|
|                        | time <sup>2</sup> | -0.12  | 0.05  | -2.36 | .020  |               |         |
|                        | time <sup>3</sup> | 0.00   | 0.00  | 2.22  | .029  |               |         |
| <b>AI [%]</b>          | (Intercept)       | 66.13  | 1.54  | 42.97 | <.001 | 0.636 [0.070] | 6.85    |
|                        | time              | -2.36  | 0.65  | -3.66 | <.001 |               |         |
|                        | time <sup>2</sup> | 0.23   | 0.09  | 2.66  | .009  |               |         |
|                        | time <sup>3</sup> | -0.01  | 0.00  | -2.38 | .020  |               |         |
| <b>Shr at dIsc min</b> | (Intercept)       | 287.63 | 20.29 | 14.18 | <.001 | 0.539 [0.060] | 131.774 |
|                        | time              | -21.95 | 9.37  | -2.34 | .021  |               |         |
|                        | time <sup>2</sup> | 1.84   | 1.26  | 1.46  | .146  |               |         |
|                        | time <sup>3</sup> | -0.04  | 0.03  | -1.25 | .215  |               |         |
| <b>T ½ (1/s)</b>       | (Intercept)       | 1.89   | 0.18  | 10.45 | <.001 | 0.609 [0.074] | 0.967   |
|                        | time              | 0.27   | 0.08  | 3.48  | .001  |               |         |
|                        | time <sup>2</sup> | -0.03  | 0.01  | -2.41 | .018  |               |         |
|                        | time <sup>3</sup> | 0.00   | 0.00  | 2.11  | .038  |               |         |

**Table S3: Descriptive Statistics and statistical results of erythrocyte staining intensities**

|                          | aCov (N= 9)  |         |         |        | Con (N =28 <sup>a</sup> bzw. 29 <sup>b</sup> ) |         |         |        | W   | p         |
|--------------------------|--------------|---------|---------|--------|------------------------------------------------|---------|---------|--------|-----|-----------|
|                          | M (SD)       | 25% -   | 75%-    | Median | M (SD)                                         | 25% -   | 75%-    | Median |     |           |
|                          |              | Quantil | Quantil |        |                                                | Quantil | Quantil |        |     |           |
| Immuno 1177 <sup>a</sup> | 6.14 (2.47)  | 2.85    | 8.25    | 6.64   | 6.72 (2.91)                                    | 4.46    | 8.22    | 6.84   | 139 | .658      |
| Nitro <sup>b</sup>       | 14.48 (7.47) | 8.92    | 18.95   | 12.89  | 4.75 (2.32)                                    | 2.95    | 6.08    | 4.43   | 14  | 5.914e-06 |

Comparison between aCov and healthy controls (Con) was possible for t0, only.

Unpaired Wilcoxon tests were used to determine the difference between aCov at t0 and Con.
